# Supplementary material for: Structure-based de novo drug design using 3D deep generative models
Source: Royal Society of Chemistry journal article supplement (doi:10.1039/d1sc04444c), 2021-01-01
Supplement: d1sc04444c1.pdf [file d1sc04444c1.pdf]

# DeepLigBuilder: An AI-Based Approach to *De Novo* Drug Design

Chemical  
Science

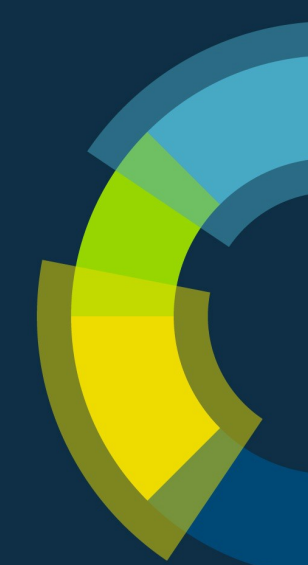

Deep learning-based drug design approaches that can build molecular structures from scratch are gaining a lot of attention

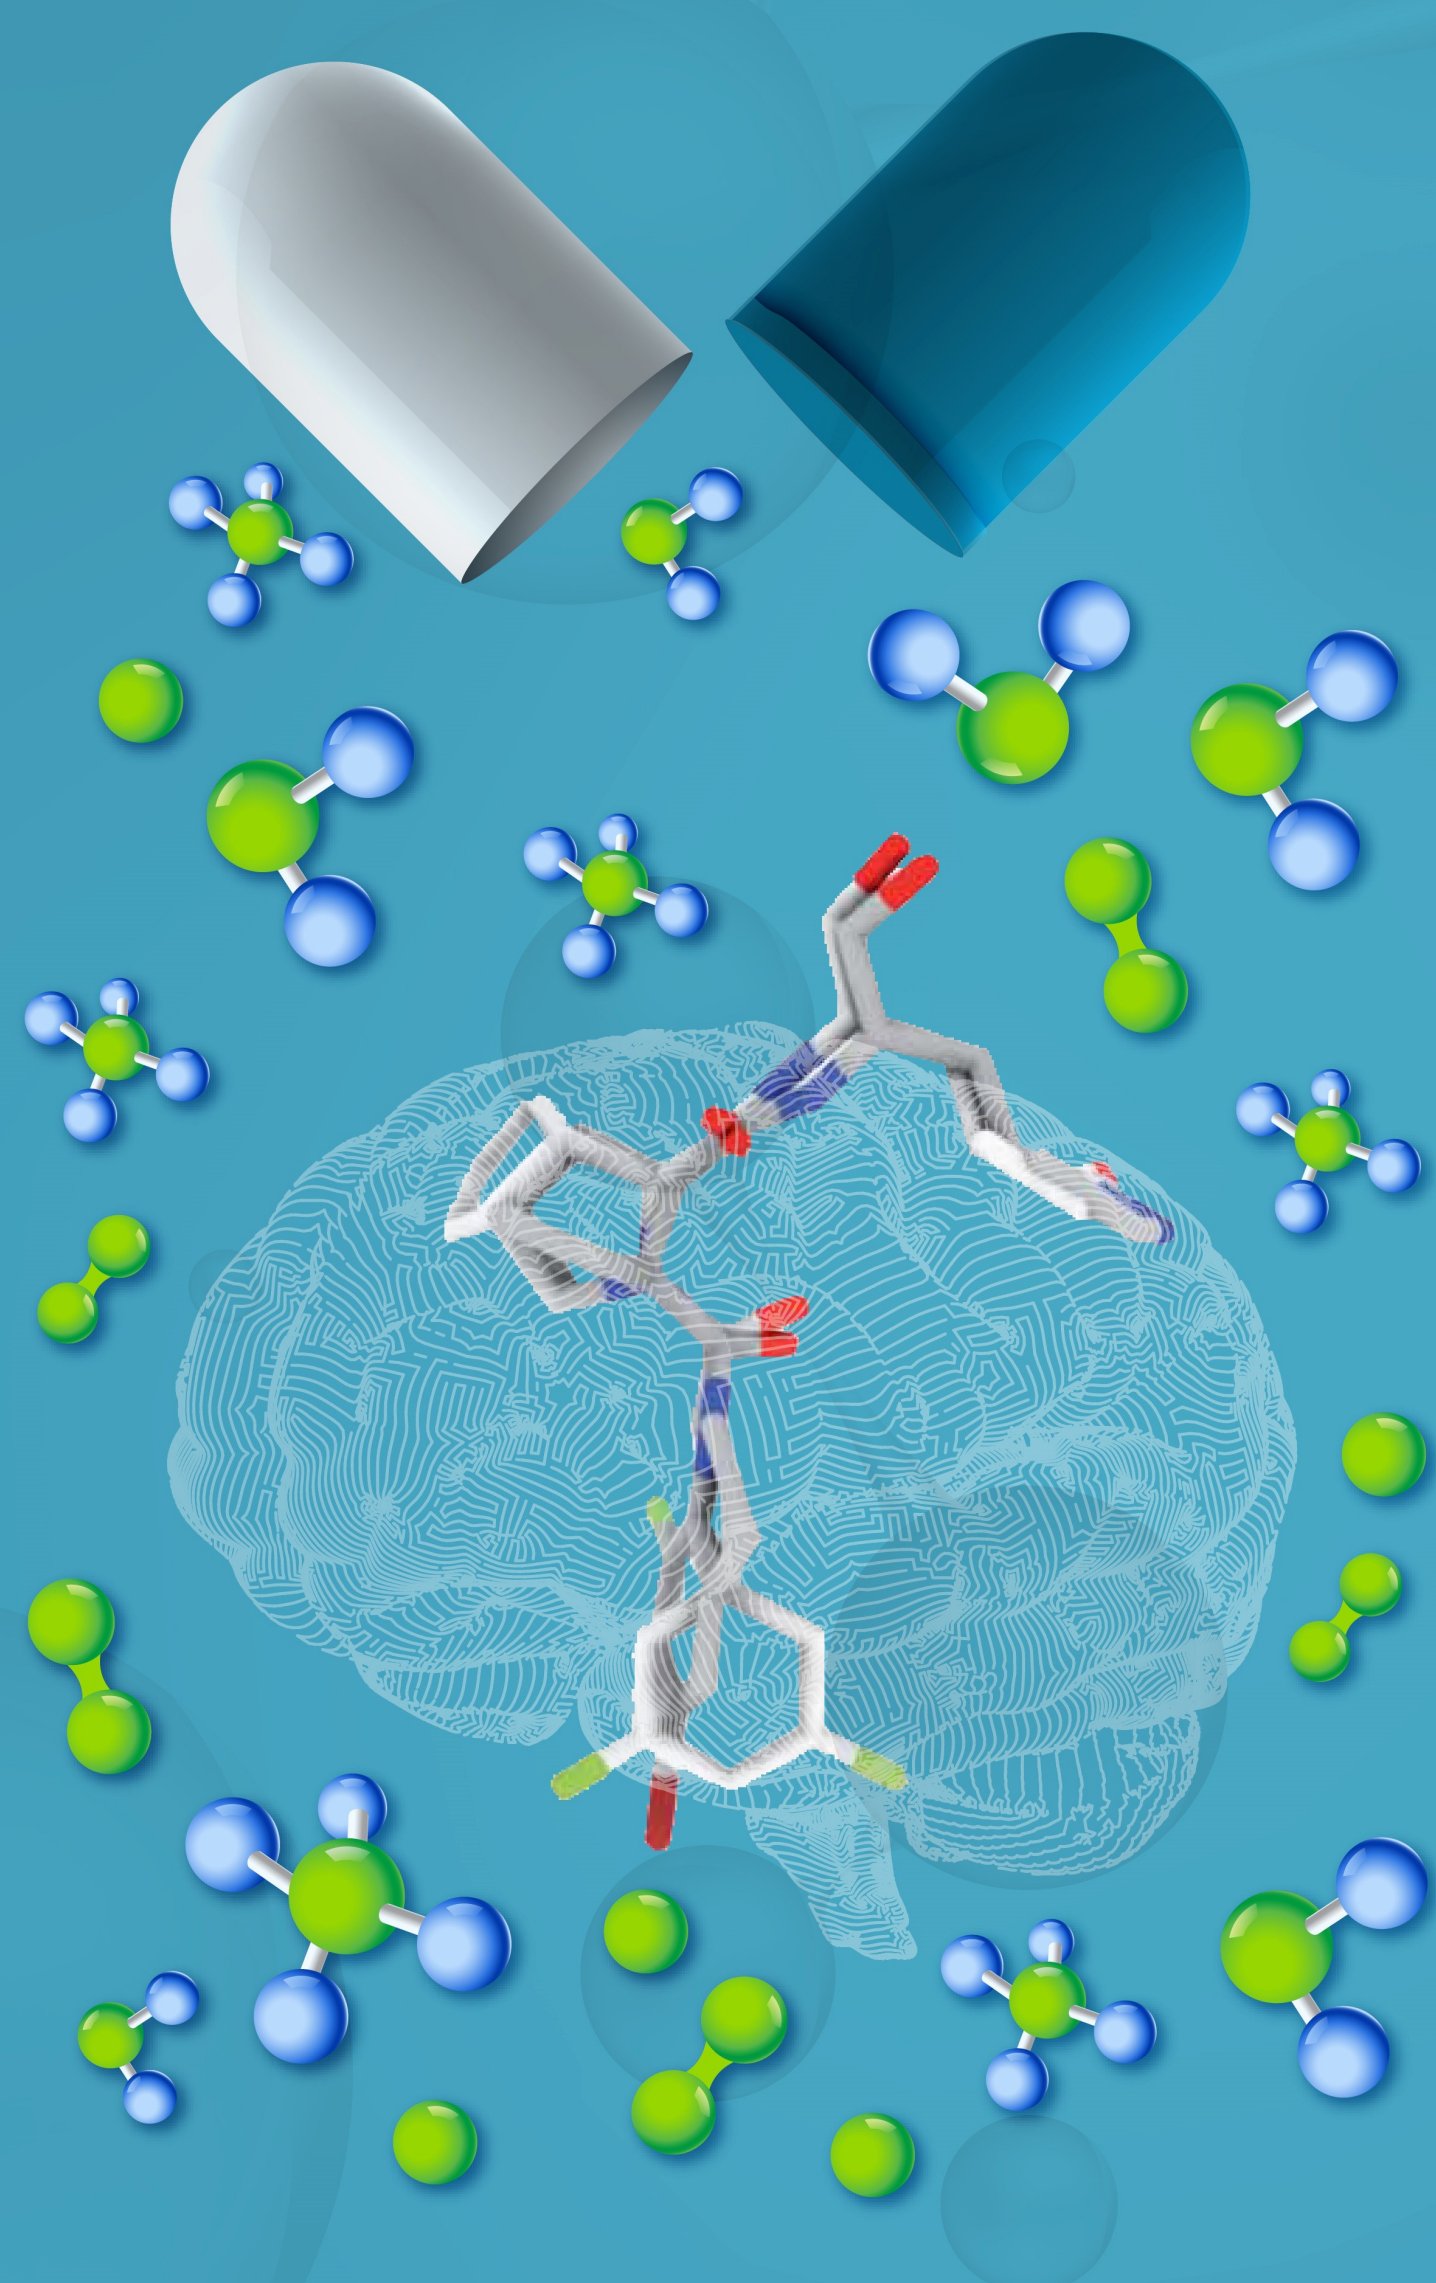

But most approaches find it difficult to generate 3D molecular structures

**Can a deep generative model for *de novo* molecular design generate 3D structures on target sites?**

## DeepLigBuilder

Combines:

Ligand Neural Network to generate valid 3D drug-like molecules

Monte Carlo tree search to look for strong binding molecules

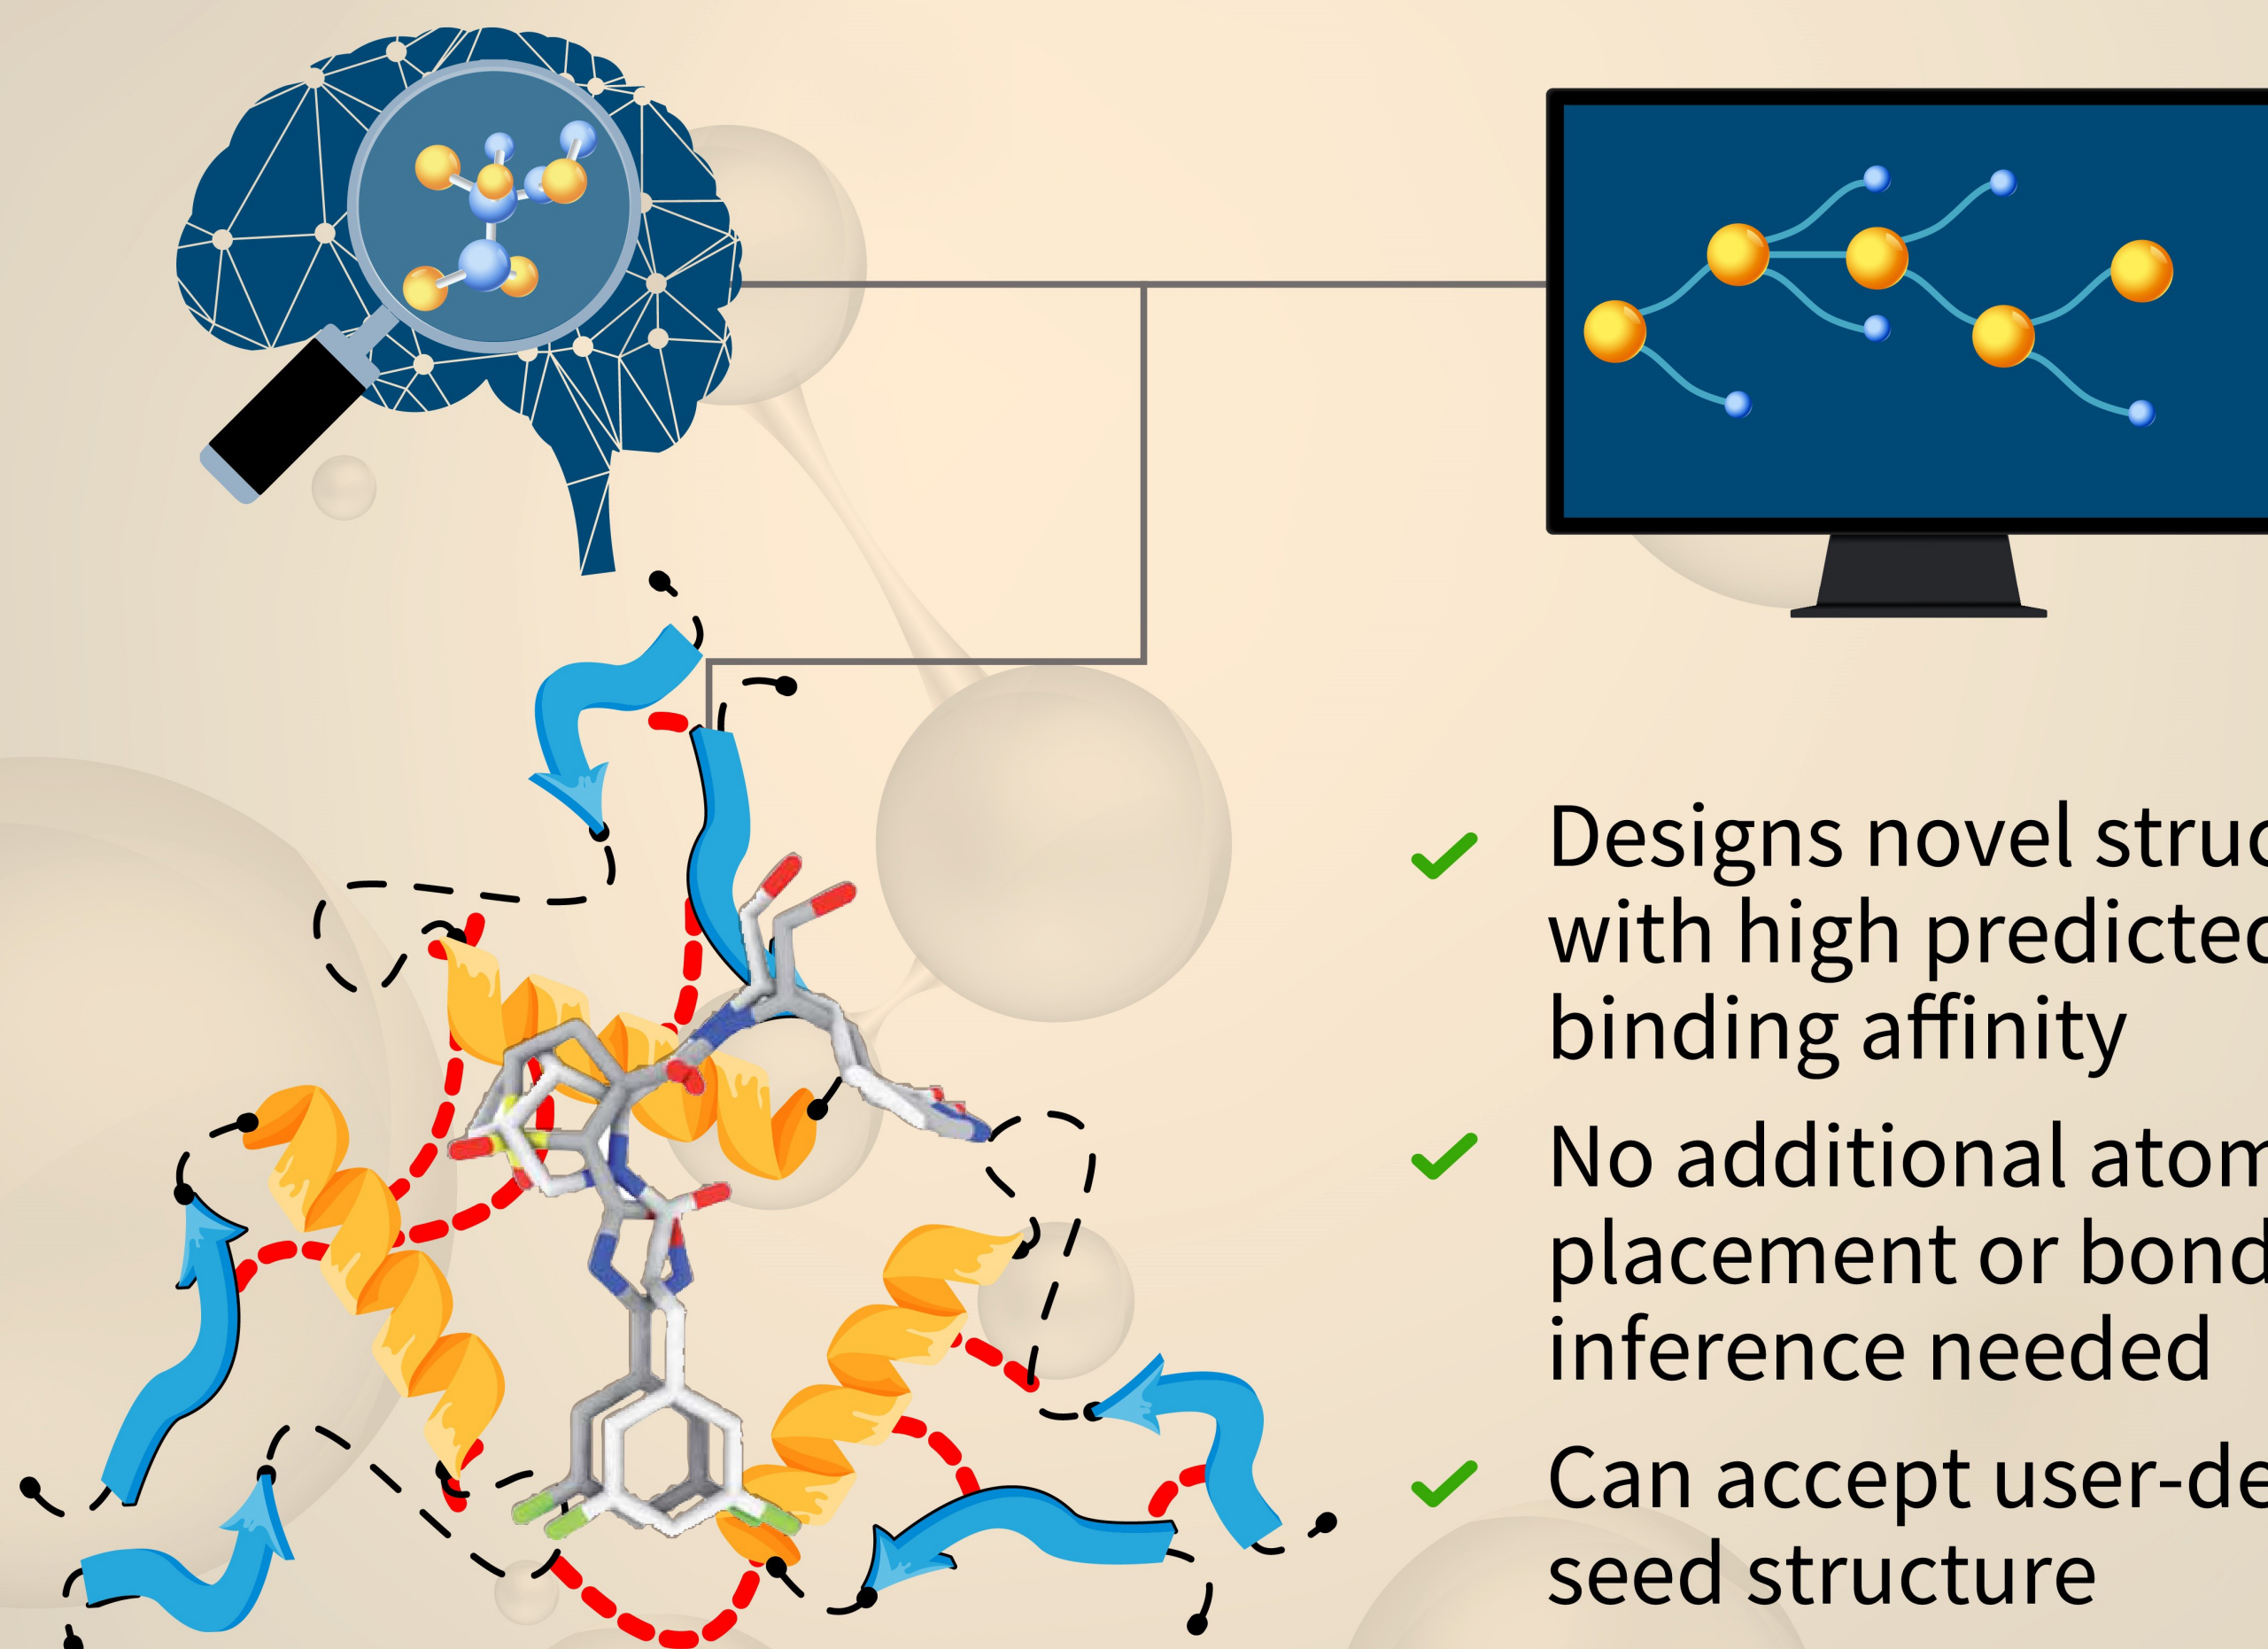

**DeepLigBuilder is a state-of-the-art tool for design and optimization of new drugs and functional organic molecules**
